# Supplementary material for: Impact of Standardized Prenatal Clinical Training for Traditional Birth Attendants in Rural Guatemala
Source: MDPI journal article supplement (doi:10.3390/healthcare6020060), 2018-06-09
Supplement: s1 [file s1]

# Supplementary Materials: Impact of standardized prenatal clinical training for traditional birth attendants in rural Guatemala

Hernandez Sasha, Oliveira Jessica, Jones Leah, Chumil Juan-Shirazian Taraneh

|                |                                                                                                                                            |
|----------------|--------------------------------------------------------------------------------------------------------------------------------------------|
| <b>Week 1</b>  | Day 1: An Overview of Maternal-Infant Care<br>Day 2: The Role of the Birth Attendant, Health Care Resources and the Emergency Plan         |
| <b>Week 2</b>  | Day 3: Sexual Organs, Sexual Desire, and Menstruation, Ovulation, and Fertilization<br>Day 4: The Natural Development of Pregnancy         |
| <b>Week 3</b>  | Day 5: The Choice of Motherhood, The Importance of Prenatal Care- Part 1<br>Day 6: The Importance of Prenatal Care-Part 2                  |
| <b>Week 4</b>  | Day 7: Pregnancy Complications, Part 1<br>Day 8: Pregnancy Complications, Part 2                                                           |
| <b>Week 5</b>  | Day 9: Signs and Symptoms of Danger during Pregnancy<br>Day 10: Case Studies on Prenatal Care, Exam 1                                      |
| <b>Week 6</b>  | Day 11: Review Exam 1<br>Day 12: Tetanus Vaccine, Introduction to Stages of Labor                                                          |
| <b>Week 7</b>  | Day 13: Uncomplicated Labor: Stage One and Two<br>Day 14: Uncomplicated Labor: Stage Two and Three                                         |
| <b>Week 8</b>  | Day 15: Review of Stages of Labor, Basic Care of the Newborn<br>Day 16: Complications during Labor and Delivery                            |
| <b>Week 9</b>  | Day 17: When to Refer During Labor<br>Day 18: Neonatal Resuscitation, Immediate Post-Partum Care, Maternal Lactation                       |
| <b>Week 10</b> | Day 19: Maternal Lactation Review, Post-Partum Care: Day 1 & 4<br>Day 20: Review of Normal and Complicated Labor, Exam 2                   |
| <b>Week 11</b> | Day 21: Medicinal Plants, Sharing of Experiences during Labor<br>Day 22: Infection Prevention and Management, Sterilization of Birth Tools |
| <b>Week 12</b> | Day 23: Family Planning Methods<br>Day 24: Case Studies: Family Planning, Self Breast Exam                                                 |
| <b>Week 13</b> | Day 25: Vaginal Infections and STIs<br>Day 26: Nutrition and Malnutrition                                                                  |
| <b>Week 14</b> | Day 27: Complicated Labor<br>Day 28: Cumulative review, Final Exam                                                                         |

**Figure S1.** The School of POWHER curricular overview

| HISTORY                                                                                                  |                     |
|----------------------------------------------------------------------------------------------------------|---------------------|
| Task                                                                                                     | Performed (✓/ x/NA) |
| 1 If mother knows LMP, accurately calculates EDD                                                         |                     |
| 2 If mother knows LMP, calculates weeks of gestation                                                     |                     |
| 3 Focused OB History:                                                                                    |                     |
| Age                                                                                                      |                     |
| # of previous pregnancies                                                                                |                     |
| # of living children                                                                                     |                     |
| Asks about problems with previous pregnancies                                                            |                     |
| 4 Refers appropriately if prior complicated pregnancy                                                    |                     |
| 5 Asks about any significant past medical history                                                        |                     |
| 6 Asks about current medications                                                                         |                     |
| 7 Documents history                                                                                      |                     |
| CLINICAL SKILLS                                                                                          |                     |
| Task                                                                                                     | Performed (✓/ x/NA) |
| 1 Washes hands with soap and water or uses anti-septic                                                   |                     |
| 2 Accurately measures blood pressure                                                                     |                     |
| 3 Accurately measures heart rate                                                                         |                     |
| 4 Correctly measures fundal height                                                                       |                     |
| 5 Listens to fetal heart rate with Doppler                                                               |                     |
| 6 Finds position of fetus                                                                                |                     |
| 7 If fetal position is oblique, transverse, or breech, discusses with mother appropriate places to birth |                     |
| 8 Documents all findings                                                                                 |                     |
| COUNSELING                                                                                               |                     |
| Task                                                                                                     | Performed (✓/ x/NA) |
| 1 Reviews signs and symptoms of danger:                                                                  |                     |
| Severe headache                                                                                          |                     |
| Abdominal pain                                                                                           |                     |
| Vaginal bleeding                                                                                         |                     |
| Fever                                                                                                    |                     |
| 2 If mother reports any warning signs, appropriately refers                                              |                     |
| 3 Discusses labor plan with mother:                                                                      |                     |
| Asks where the birth will take place                                                                     |                     |
| Asks what the mother plans to do in case of an emergency                                                 |                     |
| 4 Distributes pre-natal vitamins                                                                         |                     |
| 5 Counsels mother on importance of pre-natal vitamins                                                    |                     |
| 6 If mother does not have Td vaccine, counsels on vaccination before delivery                            |                     |

Figure S2. Prenatal Clinical Assessment Tool

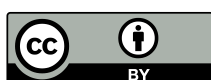

© 2018 by the authors. Licensee MDPI, Basel, Switzerland. This article is an open access article distributed under the terms and conditions of the Creative Commons Attribution (CC BY) license (<http://creativecommons.org/licenses/by/4.0/>).
